# Supplementary material for: Tunable optical activity of plasmonic dimers assembled by DNA origami
Source: Royal Society of Chemistry journal article supplement (doi:10.1039/c5nr01634g), 2015-01-01
Supplement: c5nr01634g1.pdf [file c5nr01634g1.pdf]

## Supporting Information

### Tunable Optical Activity of Plasmonic Dimers Assembled by DNA

#### Origami

Chengcheng Rao<sup>a</sup>, Zheng-Gang Wang<sup>b</sup>, Na Li<sup>b</sup>, Wei Zhang<sup>c\*</sup>, Xuecheng Xu<sup>a\*</sup> and Baoquan Ding<sup>b\*</sup>

<sup>a</sup> Department of Physics, East China Normal University, No.500 Dong Chuan Road, 200241 Shanghai, China.

<sup>b</sup> Key Laboratory of Nanosystem and Hierarchical Fabrication, National Center for Nanoscience and Technology, Chinese Academy of Sciences, No. 11 BeiYiTiao, ZhongGuanCun, Beijing 100190, China.

<sup>c</sup> Institute of Applied Physics and Computational Mathematics, Beijing 100088, P. R. China

\*Address correspondence to [zhang\\_wei@iapcm.ac.cn](mailto:zhang_wei@iapcm.ac.cn), [xcxu@phy.ecnu.edu.cn](mailto:xcxu@phy.ecnu.edu.cn) and [dingbq@nanoctr.cn](mailto:dingbq@nanoctr.cn)

#### Experimental Methods

##### 1. Chemicals

HAuCl<sub>4</sub>•3H<sub>2</sub>O, Hexadecyltrimethyl ammonium bromide (CTAB), Sodium dodecyl sulfate (SDS), Tris (2-carboxyethyl) phosphine hydrochloride (TCEP), Bis (p-sulfonatophenyl) phenyl phosphine dihydrate dipotassium salt (BSPP), Silver nitrate (AgNO<sub>3</sub>), Sodium borohydride (NaBH<sub>4</sub>), L-ascorbic acid, Trisodium citrate dehydrate, and Citric acid were purchased from Sigma-Aldrich. All chemicals were used as received without further purifications. All oligonucleotides were purchased from Invitrogen.

##### 2. Preparation of DNA origami structures

Rectangular origami templates were prepared according to reference 1 with several changes. All of the side staples were left out to prevent aggregation via helix stacking interactions between adjacent origami. Additionally, several groups of different capture strands were designed to assemble AuNRs on the origami templates. These capture strands were extended on the 5' end by 15 bases with specific sequences. The rectangular DNA origami was annealed at a ratio of 1:5:8 for the M13 strand, capture strands, and staples strands. The DNA origami was subsequently assembled in a 1×TAE/Mg<sup>2+</sup> buffer (Tris, 40 mM; Acetic acid, 20 mM; EDTA, 2 mM; and Magnesium acetate, 12.5 mM; pH 8.0) by cooling slowly from 90 °C to room temperature. The DNA origami was then filtered with 100 kDa (MWCO) centrifuge filters to remove the extra capture strands and staple strands for three times.

##### 3. Preparation and functionalization of the AuNRs

a. A two-step seed-mediated growth method was used to synthesize AuNRs according to reference 2.

Synthesis of the AuNR seeds: 50 μL of 2% (w/v) HAuCl<sub>4</sub> solution and 7.5 mL of 100 mM CTAB solution were added to a 25 mL flask. A 600 μL of ice-cold NaBH<sub>4</sub> solution (10 mM) was

added to the flask under vigorous stirring. The color of the solution changed quickly to yellowish brown. The resulting solution acted as nucleation seeds for the AuNR synthesis in the next step.

**Growth of AuNRs:** An 80  $\mu\text{L}$  of 2% (w/v)  $\text{HAuCl}_4$  solution was added to a 10 mL of 100 mM CTAB solution. 75  $\mu\text{L}$  of 10 mM  $\text{AgNO}_3$  solution and 50  $\mu\text{L}$  of 100 mM L-ascorbic acid solution were added to the flask in order. A 20  $\mu\text{L}$  seed solution was added to the mixture solution under stirring. The final solution was kept undisturbed at 28  $^\circ\text{C}$  about 5 hours after being stirred for 1 minute.

**b. Purification of the AuNRs**

A 10 mL AuNR solution was centrifuged at 8000 rpm for 30 minutes and then the supernatant was removed with a pipette. The pellet was suspended in 10 mL water. The solution was centrifuged at 3000 rpm for 25 minutes and the supernatant was collected. The AuNR solution was then centrifuged at 8000 rpm for 30 minutes. The supernatant was discarded. The pellet was suspended in 100  $\mu\text{L}$  water. The concentration was measured by a UV spectrometer.

**c. Preparation of the AuNRs modified with thiolated DNA**

The disulfide bonds in the thiolated oligonucleotides were reduced to monothiol using TCEP (20mM, 1h) in water. The oligonucleotides were purified using size exclusion columns (G-25, GE Healthcare) to remove small molecules. The purified DNA was added to the AuNR solution (OD~1) containing 0.01% (w/v) SDS with a molecular ratio of 3000: 1. The mixture solution was incubated for 6 hours at 28  $^\circ\text{C}$ . Then the buffer concentration was adjusted to 1 $\times$  TBE (89 mM Tris, 89 mM boric acid, 2 mM EDTA, pH 8.0) from a 10 $\times$  TBE buffer. After that, a 5M NaCl solution was slowly added until the final concentration of NaCl reached 500 mM in 24 hours. Subsequently, the AuNR-DNA conjugates were centrifuged at 8000 rpm for 25 minutes. The pellet was suspended in a 1 mL 0.5 $\times$  TBE buffer containing 200 mM NaCl while the supernatant was discarded. The same centrifugation procedure was repeated three times to completely remove the excess thiolated DNA.

#### **4. Preparation and functionalization of the AuNSs**

**a. Synthesis of the AuNSs.**

AuNSs were synthesized by a one-step method. A 1.25 mL  $\text{HAuCl}_4$  solution (0.2%, w/v) was diluted in 25 mL double-distilled water and heated to boiling. A 1 mL sodium citric solution (1%, w/v; containing 0.05% citric acid) was added to the flask under vigorous stirring. The solution in the flask was kept boiling for 5 minutes under stirring and then cooled at room temperature.

**b. Surface modification of the AuNSs with BSPP.**

BSPP (15 mg) was added to the Au colloidal solution (50 mL) and the mixture was shaken overnight at room temperature. Sodium Chloride (solid) was added slowly to this mixture solution while stirring until the solution color was changed from deep burgundy to light purple. The resulting mixture was centrifuged at 3000 rpm for 30 min and the supernatant was carefully removed with a pipette. AuNSs were then resuspended in a 1 mL BSPP solution (2.5 mM). Upon mixing with 1mL methanol, the mixture was centrifuged. The supernatant was removed and the AuNSs were resuspended again in a 1 mL BSPP solution (2.5 mM). The concentration of the AuNSs was estimated according to the optical absorption at  $\sim 523$  nm. Phosphine coating increases the amount of negative charges on the AuNS surface and therefore stabilizes the AuNSs at high electrolyte concentrations.

**c. Preparation of AuNS-DNA conjugates.**

AuNS-DNA conjugates were prepared following a regular protocol. The disulfide bond in the thiol-modified oligonucleotides was reduced to monothiol using TCEP (20 mM, 1 hour) in water. The oligonucleotides were purified using size exclusion columns (G-25, GE Healthcare) to remove small molecules. Monothiol modified oligonucleotides and BSPP modified AuNSs were then incubated in a DNA to Au molar ratio of more than 300:1 in a 1 × TBE buffer solution (89 mM Tris, 89 mM boric acid, 2 mM EDTA, pH 8.0, containing 50 mM NaCl) for 20 hours at room temperature. The concentration of NaCl was slowly increased to 300 mM in the subsequent 20 hours in order to increase the binding density of thiolated DNA on AuNSs. AuNS-DNA conjugates were then washed using a 1×TBE buffer solution in 100 kDa (MWCO) centrifuge filters to remove the extra free oligonucleotides. The concentration of the AuNS-DNA conjugates was estimated according to the optical absorption at ~ 523 nm. Freshly prepared, fully coated AuNSs do not precipitate in a 1×TAE/Mg<sup>2+</sup> buffer, preferable for the formation of DNA origami.

#### **4. Self-assembly of the AuNRs/AuNSs on the DNA origami templates and electrophoretic gel purification**

The purified rectangular DNA origami structures were mixed with the AuNR/AuNS-DNA conjugates. The mixture was annealed from 45 °C to 25 °C for 30 cycles over 48 hours. The annealed product of the DNA origami assembled AuNRs was loaded in a 1% Ethidium Bromide stained agarose gel (running buffer 1× TAE/Mg<sup>2+</sup>, loading buffer 60% glycerol, 15 V/cm). Selected bands were cut out and the DNA origami assembled AuNRs were extracted from the gel with Freeze-Squeeze columns (Bio-Rad) at 4 °C or by electro-elution with dialysis tubing membranes (MWCO: 50K).

#### **5. TEM characterization of the DNA origami assembled AuNRs/AuNSs**

The samples for TEM imaging were prepared by depositing a 3 µL of the sample solution on a carbon-coated TEM grid. After 15 min, the excess solution was wicked from the grid using filter paper. To remove the deposited salt, the grid was washed with a droplet of water and the excess water was wicked away using filter paper. A droplet of a 1% uranyl acetate solution was used to treat the grid and the excess solution was wicked away. Then, the grid was treated with a second droplet of the uranyl acetate solution for 40 seconds and the excess solution was removed using filter paper. All the grids were kept at room temperature. TEM studies were conducted using a Tecnei G2-20S TWIN (200 kV). AuNRs in a few of the dimers had deformation, probably because of the drying process on the TEM grids.

#### **6. Circular Dichroism measurements**

The CD spectra were measured by a Jasco J-815 spectropolarimeter using the following parameters: wavelength range, 200 nm to 900 nm; optical length, 0.5 cm; scanning speed, 200 nm/min.

### Additional Figures

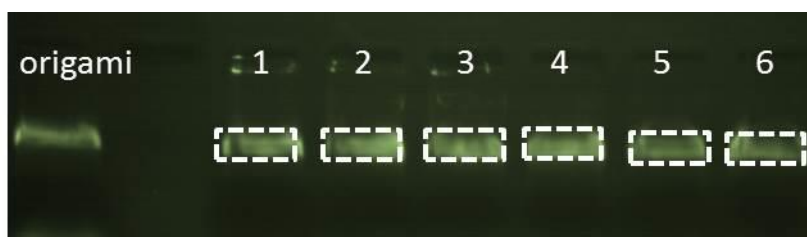

**Figure S1** 1% Ethidium Bromide stained agarose gel image of each design. The leftmost Lane is origami only. Others are the AuNR dimers assembled on rectangular origami, which correspond to nanoarchitectures (1)-(6) in Figure 1b. The target products are contained in the bands highlighted by the white dashed lines.

Additional TEM images of the AuNR dimer (1)

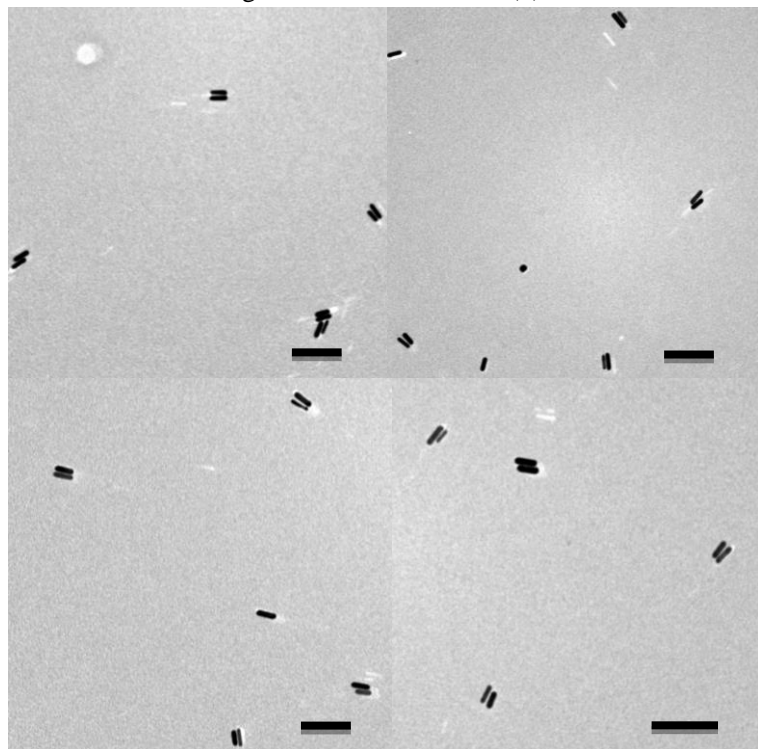

Additional TEM images of the AuNR dimer (2)

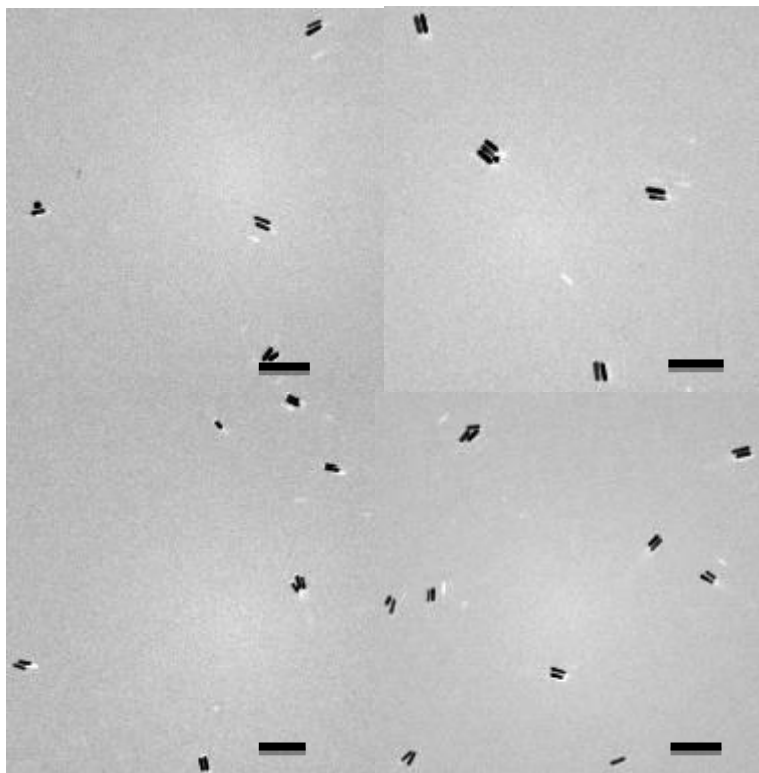

Additional TEM images of the AuNR dimer (3)

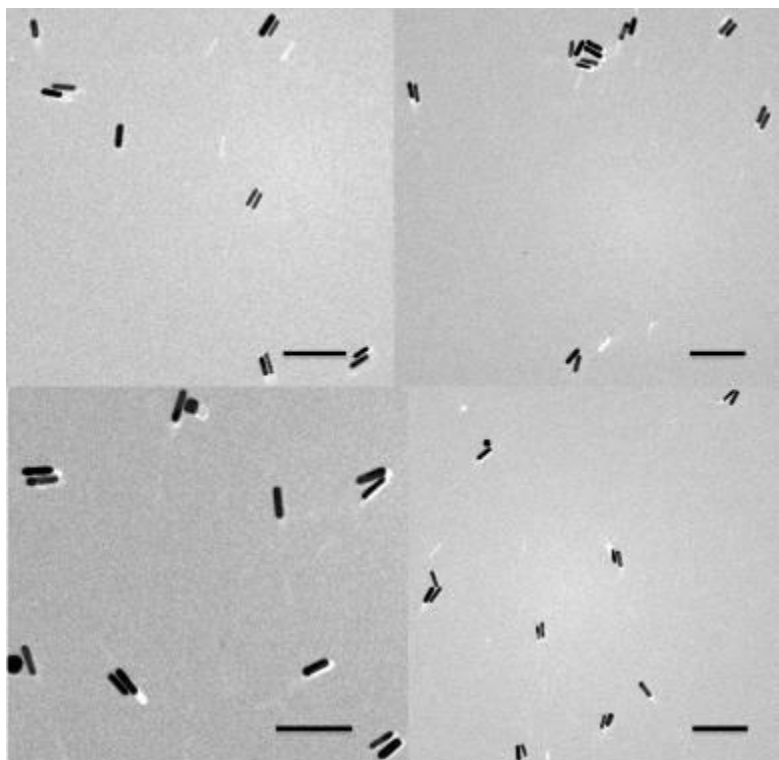

Additional TEM images of the AuNR dimer (4)

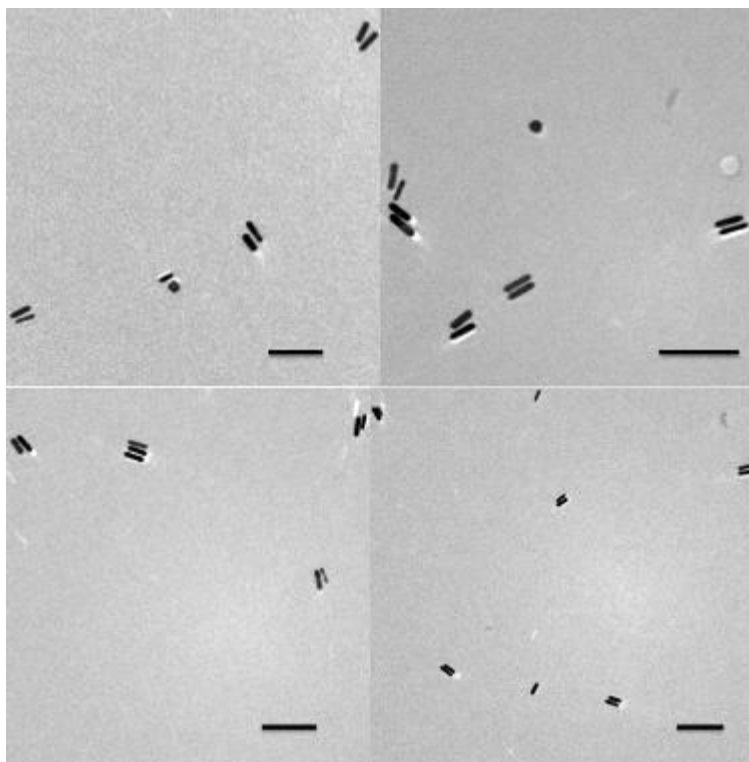

Additional TEM images of the AuNR dimer (5)

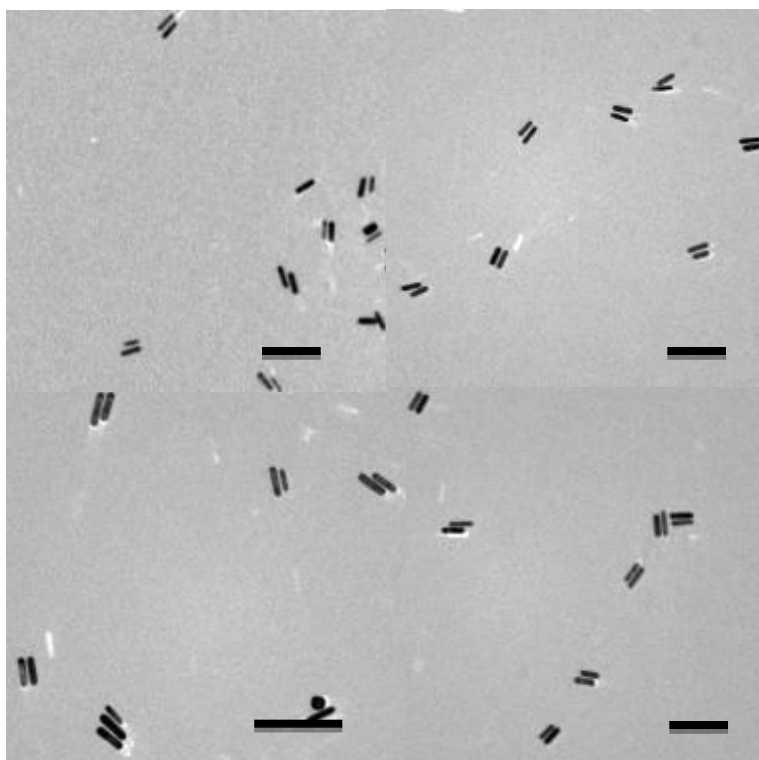

Additional TEM images of the AuNR dimer (6)

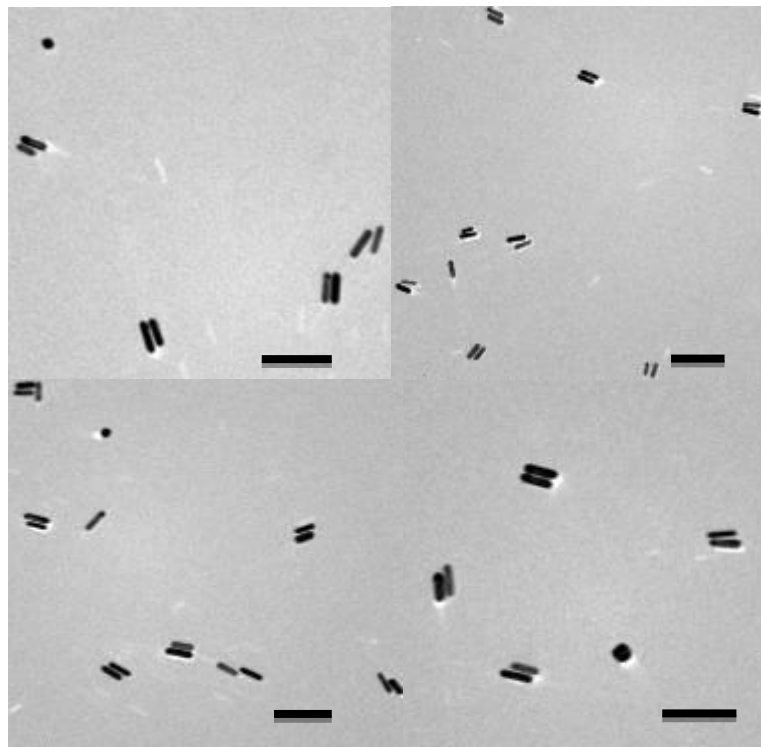

**Figure S2** Additional TEM images of the AuNR dimers correspond to nanoarchitectures (1)-(6) in Figure 1b (scale bar: 100 nm).

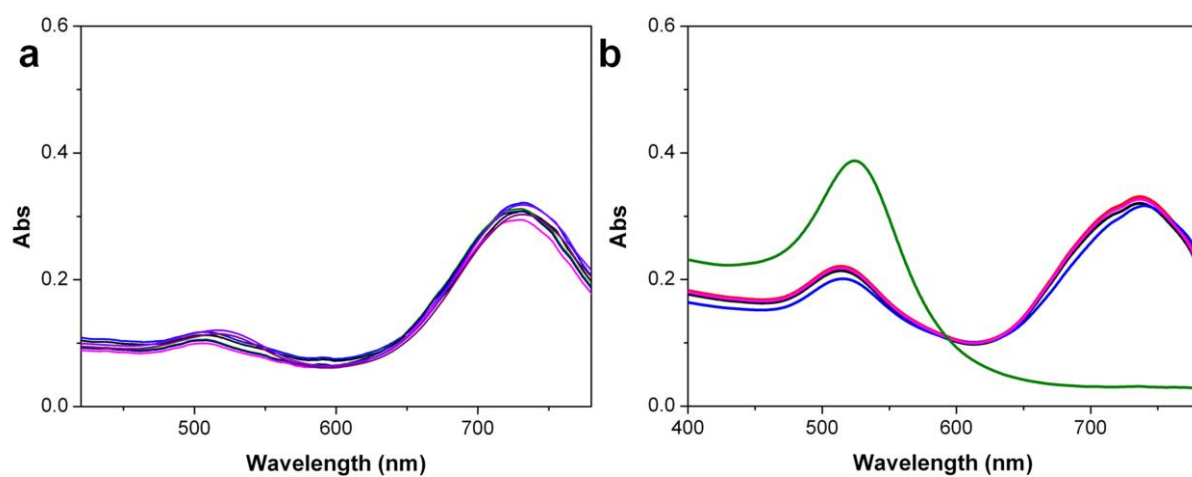

**Figure S3** (a) Absorption spectra of six types of AuNR dimer nanoarchitectures. Different colors correspond to nanoarchitectures shown in Figure 3. (b) Absorption spectra of the four types of AuNR-AuNS heterodimers and the AuNS. Different colors correspond to the nanoarchitectures shown in Figure 4.

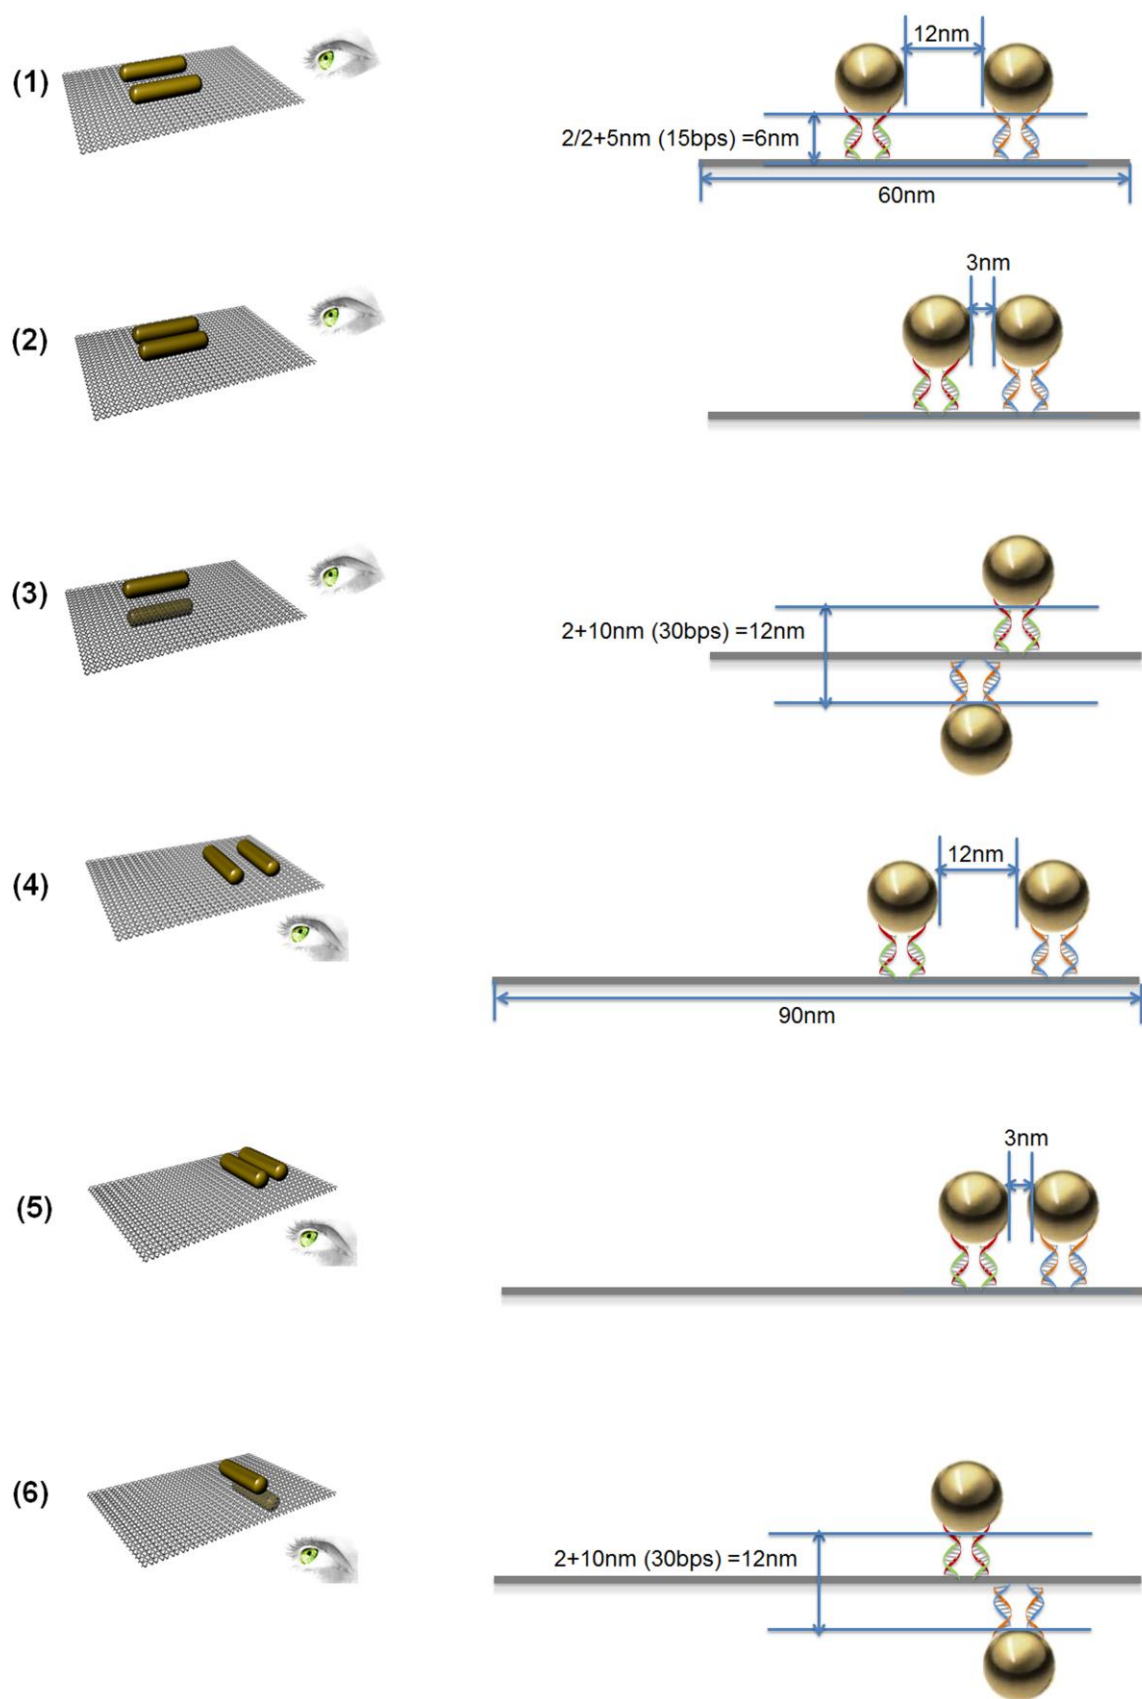

**Figure S4** Diagram of six types of AuNR dimers assembled in different configuration



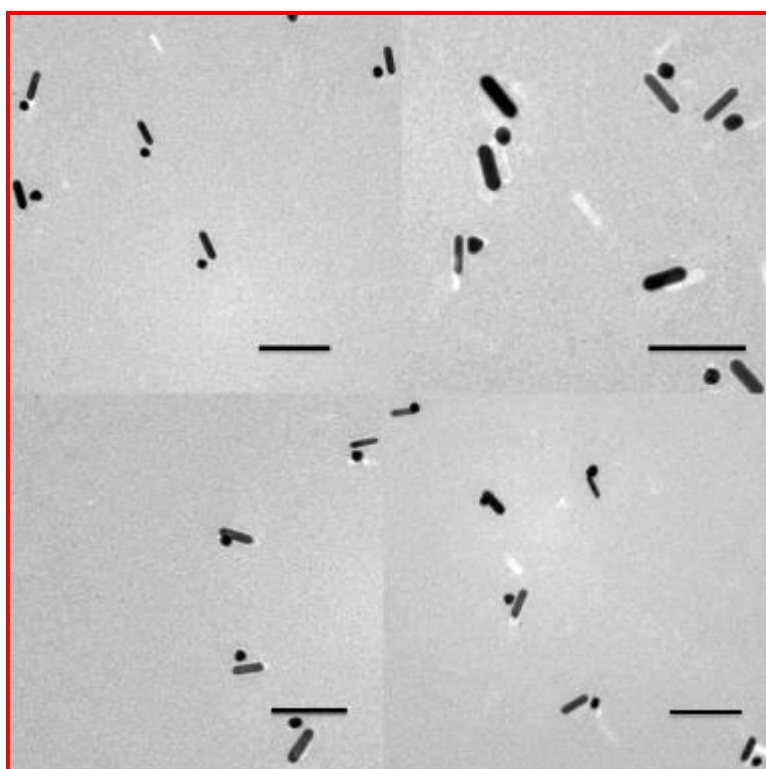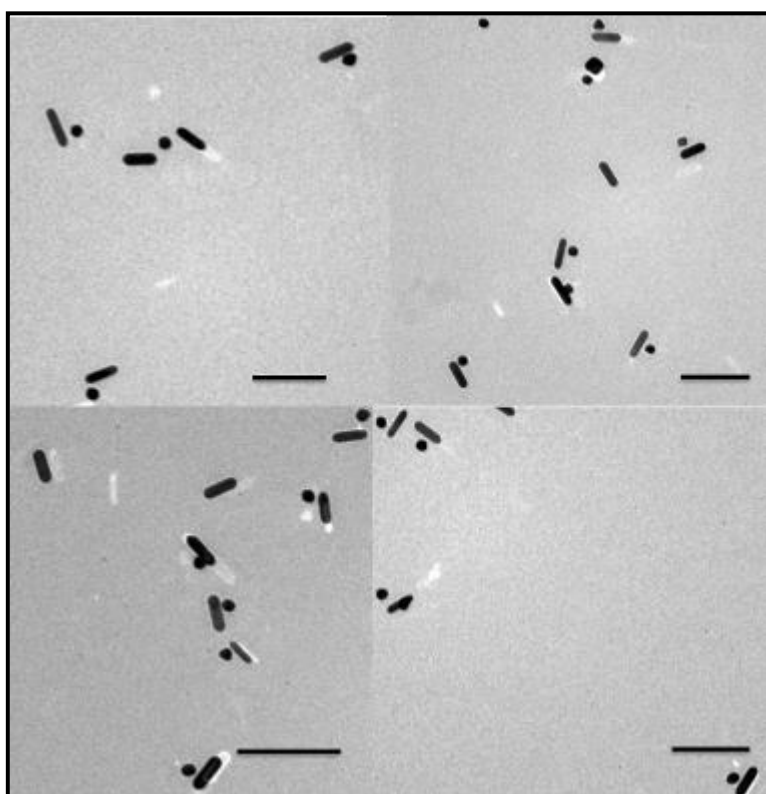

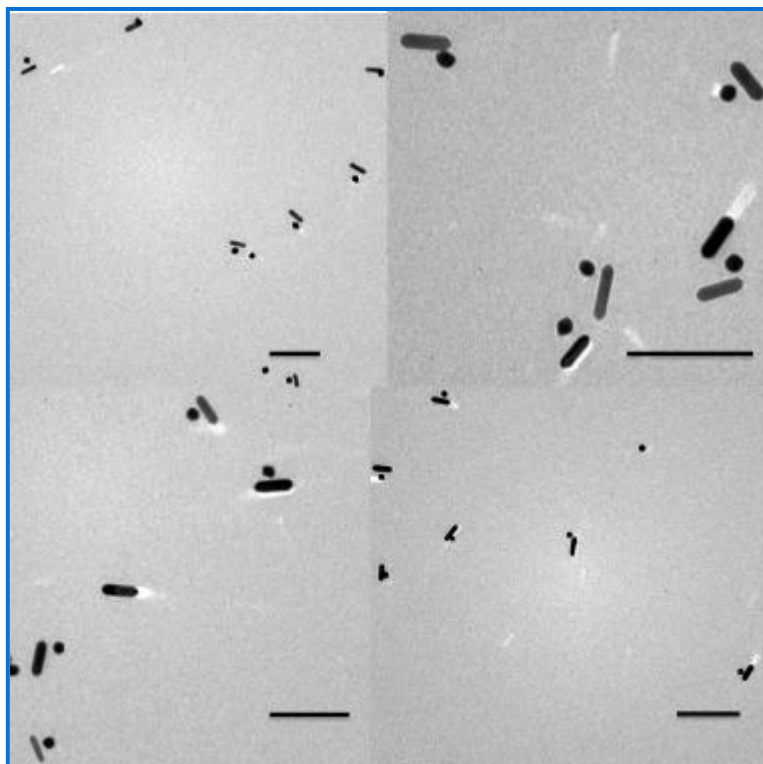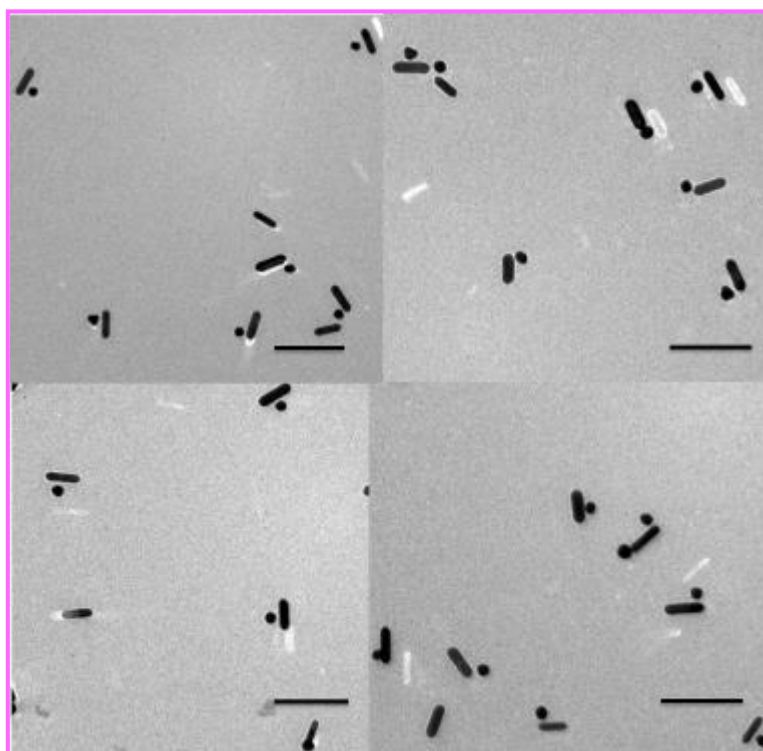

**Figure S5** Additional TEM images of the AuNS-AuNR nanoarchitectures (scale bar: 100 nm). Different colors correspond to the nanoarchitectures shown in Figure 4.

### Theoretical Methods

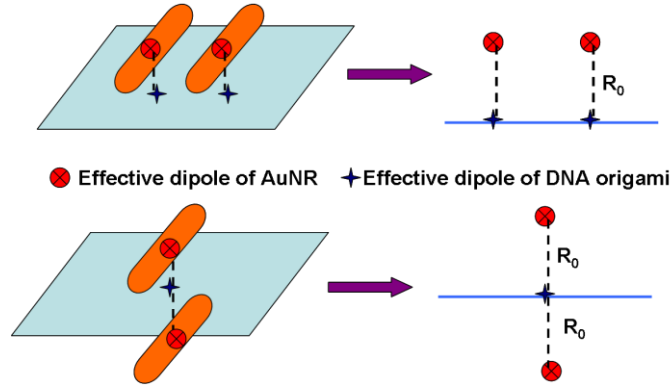

**Figure S6** Schematic diagram of the theoretical model.

The optical response of the nanocomplexes is determined by the interactions among the effective dipoles (see figure S6). In our system, the AuNR/AuNS is represented by a dipole at its center with dipole moment

$$\vec{p}_M = \alpha_M \vec{E}_0, \text{ and polarizability}$$

$$\alpha_M = V_{AuNR} \frac{\epsilon_M - \epsilon_0}{\epsilon_0 + L_3(\epsilon_M - \epsilon_0)}, \quad (S1)$$

where  $\epsilon_0$  and  $\epsilon_M$  the dielectric constants for the background and for the bulk Au and

$$L_3 = \frac{1-e^2}{e^2} \left( \frac{1}{2e} \ln \frac{1+e}{1-e} - 1 \right), \quad (S2)$$

the geometrical factor of AuNR viewed as ellipsoid with  $e = \sqrt{1-(b/a)^2}$ ,  $a, b$  the length of long and short axis. The interaction between two AuNRs (with polarizabilities  $\alpha_{M1}$  and  $\alpha_{M2}$ )

leads to the effective dipole with renormalized polarizabilities  $\alpha_{M1}^e = \alpha_{M1} \frac{1 - \alpha_{M2} T_0}{1 - \alpha_{M1} \alpha_{M2} T_0^2}$ ,

$\alpha_{M2}^e = \alpha_{M2} \frac{1 - \alpha_{M1} T_0}{1 - \alpha_{M1} \alpha_{M2} T_0^2}$  ( $T_0$  the interaction strength). In the following, we neglect the

index  $e$ .

The DNA origami may be viewed as effective dipole(s) at positions right opposite to the center of AuNR(s) /AuNS(s). The response of DNA origami/effective dipole(s) can be described by the polarizability tensor defined by

$$\vec{p}_D = \hat{\alpha}_D \cdot \vec{E}_D, \quad (S3)$$

where  $\vec{E}_D$  the electric field on the dipole(s) with dipole moment  $\vec{p}_D$ , and the polarizability

tensor

$$\hat{\alpha}_D = \begin{pmatrix} \alpha_x & -iG_z & iG_y \\ iG_z & \alpha_y & -iG_x \\ -iG_y & iG_x & \alpha_z \end{pmatrix}. \quad (S4)$$

From the basic structure and anisotropic property of DNA origami, we may have  $G_z = 0$ ,  $\alpha_z = 0$  and  $G_y = -G_x$ . The electric field on the effective dipole of DNA origami is the summation of the incident field  $\vec{E}_0$  and the field from AuNR/AuNS

$$\frac{q}{R^3} [3\vec{n}(\vec{n} \cdot \vec{p}_M) - \vec{p}_M], \quad (S5)$$

where  $R$  the distance between the effective dipoles (Figure S6),  $\vec{n}$  the unit vector along the centers between the DNA origami effective dipoles and the center of the AuNR/AuNS,  $\vec{p}_M = \alpha_M \vec{E}_0$ , and we have added a factor  $q$  to take the multipole effects into account. The dominant contribution of circular dichroism (CD) at visible light regime is the origami induced and AuNR amplified absorption difference between left and right circularly polarized light, i.e.,

$$CD = Q_L - Q_R \quad (S6)$$

$$Q_{L/R} = \text{Im}(\alpha_M) \cdot \omega \cdot |\vec{E}^{L/R*} \cdot \vec{E}^{L/R}|^2 \quad (S7)$$

$$\vec{E}^{L/R} = \vec{E}_0^{L/R} + \frac{1}{R^3} [3\vec{n}(\vec{n} \cdot \vec{p}_D^{L/R}) - \vec{p}_D^{L/R}], \quad (S8)$$

where  $\vec{E}_0^{L/R}$  and  $\vec{p}_D^{L/R}$  are the left/right circularly polarized incident field and the induced dipole of DNA origami in the presence of incident field. The total CD of nanorod/nanosphere is  $CD = CD_1 + CD_2$ ,  $CD_i (i = 1, 2)$  the CD for the  $i$ -th nanorod/nanosphere,

$$CD_i = 2G_y V_i \text{Im}(\alpha_z^i) / R_0^3 \text{Re}(K_x - K_y) - G_y V_i \text{Im}(\alpha_z^i) / R_0^3 \text{Re}\{[1 - \alpha_x K_x / R_0^3] K_z^*\} + G_y V_i \text{Im}(\alpha_y^i) / R_0^3 \text{Re}\{[1 - \alpha_y K_y / R_0^3] K_z^*\} |\vec{E}_0|^2, \quad (S9)$$

where  $K_x = 1 - q\alpha_x^1 / R_0^3 - q\alpha_x^2 / R_0^3$ ,  $K_y = 1 - q\alpha_y^1 / R_0^3 - q\alpha_y^2 / R_0^3$ ,

$K_z = 1 + 2q\alpha_z^1 / R_0^3 + 2q\alpha_z^2 / R_0^3$ ,  $R_0$  the distance from AuNR/AuNS center to the DNA origami surface.

In the numerical calculation, we have used  $L_3 = 0.0985$  for AuNR ( $L_3 = 1/3$  for AuNS) from equation (S2) based on  $2a = 39\text{nm}$ ,  $2b = 12\text{nm}$ . We have used a Gaussian distribution of  $L_3$  with

width 0.024 to take into account the shape fluctuation of nanorods/nanoparticles. We have chosen  $q = 5.18$ ,  $\alpha_x = 10.0$ ,  $\alpha_y = 10.0$ ,  $\varepsilon_0 = 2.32$  and taken the values of  $\varepsilon_M$  from reference 3.

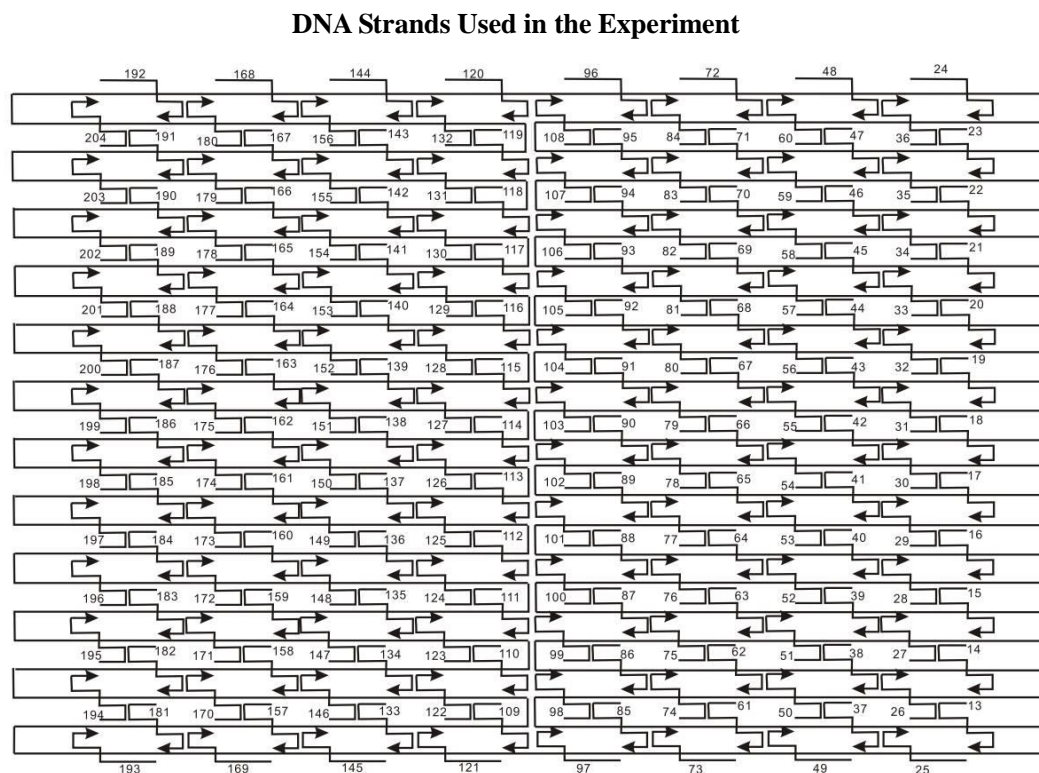

**Figure S7** The basic rectangular DNA origami used in present study without being functionalized with capture strands.

**1. Sequences used in the assembly of the DNA origami template (left to right 5'-3')**

```

13 TGGTTTTTAACGTCAAAGGGCGAAGAACCATC
14 CTTGCATGCATTAATGAATCGGCCCGCCAGGG
15 TAGATGGGGGGTAACGCCAGGGTTGTGCCAAG
16 CATGTCAAGATTCTCCGTGGGAACCGTTGGTG
17 CTGTAATATTGCCTGAGAGTCTGGAAAAGTAG
18 TGCAACTAAGCAATAAAGCCTCAGTTATGACC
19 AAACAGTTGATGGCTTAGAGCTTATTTAAATA
20 ACGAAGTAGCGTCCAATACTGCGGAATGCTTT
21 CTTTGAAAAGAACTGGCTCATTATTTAATAAA
22 ACGGCTACTTACTTAGCCGGAACGCTGACCAA
23 GAGAATAGCTTTTTCGGGATCGTCGGGTAGCA
24 ACGTTAGTAAATGAATTTTCTGTAAGCGGAGT
25 ACCCAAATCAAGTTTTTTTGGGGTCAAAGAACG
26 TGGACTCCCTTTTCACCAAGTGAGACCTGTCGT
27 GCCAGCTGCCTGCAGGTCGACTCTGCAAGGCG

```

28 ATTAAGTTCGCATCGTAACCGTGCGAGTAACA  
29 ACCCGTCGTCATATGTACCCCGGTAAAGGCTA  
30 TCAGGTCACCTTTTGCGGGAGAAGCAGAATTAG  
31 CAAAATTAAAGTACGGTGTCTGGAAGAGGTCA  
32 TTTTTCGCGAGAAAACGAGAATGAATGTTTAG  
33 ACTGGATAACGGAACAACATTATTACCTTATG  
34 CGATTTTATAGAGGACAG ATGAACGGCGCGACCT  
35 GCTCCATGAGAGGCTT TGAGGACTAGGGAGTT  
36 AAAGGCCGAAAGGAACAATAAGCTTTCCAG  
37 AGCTGATTACAAGAGTCCACTATTGAGGTGCC  
38 CCCGGGTACTTTCCAGTCGGGAAACGGGCAAC  
39 GTTTGAGGGAAAGGGGGATGTGCTAGAGGATC  
40 AGAAAAGCAACATTAAATGTGAGCATCTGCCA  
41 CAACGCAATTTTTGAGAGATCTACTGATAATC  
42 TCCATATACATACAGGCAAGGCAACTTTATTT  
43 CAAAAATCATTGCTCCTTTTGATAAGTTTCAT  
44 AAAGATTCAGGGGGTAATAGTAAACCATAAAT  
45 CCAGGCGCTTAATCATTGTGAATTACAGGTAG  
46 TTTCATGAAAATTGTGTGCGAAATCTGTACAGA  
47 AATAATAAGGTCGCTGAGGCTTGCAAAGACTT  
48 CGTAACGATCTAAAGTTTTGTCGTGAATTGCG  
49 GTAAAGCACTAAATCGGAACCCTAGTTGTTCC  
50 AGTTTGGAGCCCTTCACCGCCTGGTTGCGCTC  
51 ACTGCCCGCCGAGCTCGAATTCGTTATTACGC  
52 CAGCTGGCGGACGACGACAGTATCGTAGCCAG  
53 CTTTCATCCCCAAAAACAGGAAGACCGGAGAG  
54 GGTAGCTAGGATAAAAATTTTTAGTTAACATC  
55 CAATAAATACAGTTGATTCCCAATTTAGAGAG  
56 TACCTTTAAGGTCTTTACCCTGACAAAGAAGT  
57 TTTGCCAGATCAGTTGAGATTTAGTGTTTAA  
58 TTTCAACTATAGGCTGGCTGACCTTGTATCAT  
59 CGCCTGATGGAAGTTTCCATTAAACATAACCG  
60 ATATATTCTTTTTTCACGTTGAAAATAGTTAG  
61 GAGTTGCACGAGATAGGGTTGAGTAAGGGAGC  
62 TCATAGCTACTCACATTAATTGCGCCCTGAGA  
63 GAAGATCGGTGCGGGCCTCTTCGCAATCATGG  
64 GCAAATATCGCGTCTGGCCTTCCTGGCCTCAG  
65 TATATTTTAGCTGATAAATTAATGTTGTATAA  
66 CGAGTAGAACTAATAGTAGTAGCAAACCCTCA  
67 TCAGAAAGCCTCCAACAGGTCAGGATCTGCGAA  
68 CATTCAACGCGAGAGGCTTTTGCATATTATAG  
69 AGTAATCTTAAATTGGGCTTGAGAGAATACCA  
70 ATACGTAAAAGTACAACGGAGATTTTCATCAAG  
71 AAAAAAGGACAACCATCGCCACGCGGGTAAA

72 TGTAGCATTCCACAGACAGCCCTCATCTCCAA  
73 CCCCCGATTTAGAGCTTGACGGGGAAATCAAAA  
74 GAATAGCCGCAAGCGGTCCACGCTCCTAATGA  
75 GTGAGCTAGTTTCCTGTGTGAAATTTGGGAAG  
76 GGCGATCGCACTCCAGCCAGCTTTGCCATCAA  
77 AAATAATTTTAAATTGTAAACGTTGATATTCA  
78 ACCGTTCTAAATGCAATGCCTGAGAGGTGGCA  
79 TCAATTCTTTTAGTTTGACCATTACCAGACCG  
80 GAAGCAAAAAAGCGGATTGCATCAGATAAAAA  
81 CCAAATATAATGCAGATACATAAACACCAGA  
82 ACGAGTAGTGACAAGAACCGGATATACCAAGC  
83 GCGAAACATGCCACTACGAAGGCATGCGCCGA  
84 CAATGACACTCCAAAAGGAGCCTTACAACGCC  
85 CCAGCAGGGGCAAAATCCCTTATAAAGCCGGC  
86 GCTCACAATGTAAAGCCTGGGGTGGGTTTGCC  
87 GCTTCTGGTCAGGCTGCGCAACTGTGTTATCC  
88 GTTAAAATTTTAACCAATAGGAACCCGGCACC  
89 AGGTAAAGAAATCACCATCAATATAATATTTT  
90 TCGCAAATGGGGCGCGAGCTGAAATAATGTGT  
91 AAGAGGAACGAGCTTCAAAGCGAAGATACATT  
92 GGAATTACTCGTTTACCAGACGACAAAAGATT  
93 CCAAATCACTTGCCCTGACGAGAACGCCAAAA  
94 AAACGAAATGACCCCCAGCGATTATTCATTAC  
95 TCGGTTTAGCTTGATACCGATAGTCCAACCTA  
96 TGAGTTTCGTCACCAGTACAACTTAATTGTA  
97 GAACGTGGCGAGAAAGGAAGGGAACAACTAT  
98 CCGAAATCCGAAAATCCTGTTTGAAGCCGGAA  
99 GCATAAAGTTCCACACAACATACGAAGCGCCA  
100 TTCGCCATTGCCGGAACCAGGCATTAAATCA  
101 GCTCATTTTCGCATTAAATTTTTGAGCTTAGA  
102 AGACAGTCATTCAAAGGGTGAGAAGCTATAT  
103 TTTCATTTGGTCAATAACCTGTTTATATCGCG  
104 TTTTAATTGCCCGAAAGACTTCAAAACACTAT  
105 CATAACCCGAGGCATAGTAAGAGCTTTTTAAG  
106 GAATAAGGACGTAACAAAGCTGCTCTAAAACA  
107 CTCATCTTGAGGCAAAGAATACAGTGAATTT  
108 CTTAAACATCAGCTTGCTTTCGAGCGTAACAC  
109 ACGAACCAAAACATCGCCATTAAATGGTGGTT  
110 CGACAACCTAAGTATTAGACTTTACAATACCGA  
111 CTTTTACACAGATGAATATACAGTAAACAATT  
112 TTAAGACGTTGAAAACATAGCGATAACAGTAC  
113 GCGTTATAGAAAAAGCCTGTTTAGAAGGCCGG  
114 ATCGGCTGCGAGCATGTAGAAACCTATCATAT  
115 CCTAATTTACGCTAACGAGCGTCTAATCAATA

116 AAAAGTAATATCTTACCGAAGCCCTTCCAGAG  
117 TTATTCATAGGGAAGGTAAATATTCATTTCAGT  
118 GAGCCGCCCCACCAACCGGAACCGCGACGGAAA  
119 AATGCCCCGTAACAGTGCCCGTATCTCCCTCA  
120 CAAGCCCAATAGGAACCCATGTACAAACAGTT  
121 CGGCCTTGCTGGTAATATCCAGAACGAAGTGA  
122 TAGCCCTACCAGCAGAAGATAAAAAACATTTGA  
123 GGATTTAGCGTATTAAATCCTTTGTTTTTCAGG  
124 TTTAACGTTTCGGGAGAAACAATAATTTTCCTT  
125 TAGAATCCCTGAGAAGAGTCAATAGGAATCAT  
126 AATTACTACAAATTCTTACCAGTAATCCCATC  
127 CTAATTTATCTTTTCCTTATCATTTCATCCTGAA  
128 TCTTACCAGCCAGTTACAAAATAAATGAAATA  
129 GCAATAGCGCAGATAGCCGAACAATTCAACCG  
130 ATTGAGGGTAAAGGTGAATTATCAATCACCGG  
131 AACCAGAGACCCTCAGAACCGCCAGGGGTCAG  
132 TGCCTTGACTGCCTATTTTCGGAACAGGGATAG  
133 AGGCGGTCATTAGTCTTTAATGCGCAATATTA  
134 TTATTAATGCCGTCAATAGATAATCAGAGGTG  
135 CCTGATTGAAAGAAATTGCGTAGACCCGAACG  
136 ATCAAAATCGTCGCTATTAATTAACGGATTCG  
137 ACGCTCAAAATAAGAATAAACACCGTGAATTT  
138 GGTATTAAGAACAAAGAAAAATAATTAAAGCCA  
139 ATTATTTAACCAGCTACAATTTTCAAGAACG  
140 GAAGGAAAATAAGAGCAAGAAACAACAGCCAT  
141 GACTTGAGAGACAAAAGGGCGACAAGTTACCA  
142 GCCACCACTCTTTTCATAATCAAACCGTCACC  
143 CTGAAACAGGTAATAAGTTTTAACCCCTCAGA  
144 CTCAGAGCCACCACCCTCATTTTCCTATTATT  
145 CCGCCAGCCATTGCAACAGGAAAAATATTTTT  
146 GAATGGCTAGTATTAACACCGCCTCAACTAAT  
147 AGATTAGATTTAAAAGTTTGAGTACACGTAAA  
148 ACAGAAATCTTTGAATACCAAGTTCCTTGCTT  
149 CTGTAAATCATAGGTCTGAGAGACGATAAATA  
150 AGGCGTTACAGTAGGGCTTAATTGACAATAGA  
151 TAAGTCCTACCAAGTACCGCACTCTTAGTTGC  
152 TATTTTGCTCCCAATCCAAATAAGTGAGTTAA  
153 GCCCAATACCGAGGAAACGCAATAGGTTTACC  
154 AGCGCCAACCATTTGGGAATTAGATTATTAGC  
155 GTTTGCCACCTCAGAGCCGCCACCGATACAGG  
156 AGTGTACTTGAAAGTATTAAGAGGCCGCCACC  
157 GCCACGCTATACGTGGCACAGACAACGCTCAT  
158 ATTTTGCGTCTTTAGGAGCACTAAGCAACAGT  
159 GCGCAGAGATATCAAAATTATTTGACATTATC



160 TAACCTCCATATGTGAGTGAATAAACAAAATC  
161 CATATTTAGAAATACCGACCGTGTTACCTTTT  
162 CAAGCAAGACGCGCCTGTTTATCAAGAATCGC  
163 TTTTGTTTAAGCCTTAAATCAAGAATCGAGAA  
164 ATACCCAAGATAACCCACAAGAATAAACGATT  
165 AATCACCAAATAGAAAATTCATATATAACGGA  
166 CACCAGAGTTCGGTCATAGCCCCCGCCAGCAA  
167 CCTCAAGAATACATGGCTTTTGATAGAACCAC  
168 CCCTCAGAACCGCCACCCTCAGAACTGAGACT  
169 GGAAATACCTACATTTTGACGCTCACCTGAAA  
170 GCGTAAGAGAGAGCCAGCAGCAAAAAGGTTAT  
171 CTAAAATAGAACAAAGAAACCACCAGGGTTAG  
172 AACCTACCGCGAATTATTCATTTCCAGTACAT  
173 AAATCAATGGCTTAGGTTGGGTTACTAAATTT  
174 AATGGTTTACAACGCCAACATGTAGTTCAGCT  
175 AATGCAGACCGTTTTTTATTTTCATCTTGCGGG  
176 AGGTTTTGAACGTCAAAAATGAAAGCGCTAAT  
177 ATCAGAGAAAGAACTGGCATGATTTTATTTTG  
178 TCACAATCGTAGCACCATTACCATCGTTTTCA  
179 TCGGCATTCCGCCGCCAGCATTGACGTTCCAG  
180 TAAGCGTCGAAGGATTAGGATTAGTACCGCCA  
181 CTAAAGCAAGATAGAACCCTTCTGAATCGTCT  
182 CGGAATTATTGAAAGGAATTGAGGTGAAAAAT  
183 GAGCAAAAACCTTCTGAATAATGGAAGAAGGAG  
184 TATGTAAACCTTTTTTAAATGGAAAAATTACCT  
185 AGAGGCATAATTTTCATCTTCTGACTATAACTA  
186 TCATTACCCGACAATAAACACATATTTAGGC  
187 CTTTACAGTTAGCGAACCTCCCGACGTAGGAA  
188 TTATTACGGTCAGAGGGTAATTGAATAGCAGC  
189 CCGGAAACACACCACGGAATAAGTAAGACTCC  
190 TGAGGCAGGCGTCAGACTGTAGCGTAGCAAGG  
191 TGCTCAGTCAGTCTCTGAATTTACCAGGAGGT  
192 TATCACCGTACTCAGGAGGTTTAGCGGGGTTT  
193 GAAATGGATTATTTACATTGGCAGACATTCTG  
194 GCCAACAGTCACCTTGCTGAACCTGTTGGCAA  
195 ATCAACAGTCATCATATTCCTGATTGATTGTT  
196 TGGATTATGAAGATGATGAAACAAAATTTTCAT  
197 TTGAATTATGCTGATGCAAATCCACAAATATA  
198 TTTTAGTTTTTTCGAGCCAGTAATAAATTCTGT  
199 CCAGACGAGCGCCCAATAGCAAGCAAGAACGC  
200 GAGGCGTTAGAGAATAACATAAAAGAACCCC  
201 TGAACAAACAGTATGTTAGCAAACTAAAAGAA  
202 ACGCAAAGGTCACCAATGAAACCAATCAAGTT  
203 TGCCTTTAGTCAGACGATTGGCCTGCCAGAAT

204 GGAAAGCGACCAGGCGGATAAGTGAATAGGTG

The sequence of the single stranded circular M13mp18 viral DNA can be found at [http://www.neb.com/nebecomm/tech\\_reference/restriction\\_enzyme/sequences/13mp18.txt](http://www.neb.com/nebecomm/tech_reference/restriction_enzyme/sequences/13mp18.txt)

## **2. Capture strand sequences (left to right 5'-3')**

### **For assembly of AuNR dimers 1**

For the first AuNR

176 AAAAAAAAAAAAAAAAAA AGGTTTGAACGTCAAAAATGAAAGCGCTAAT  
177 AAAAAAAAAAAAAAAAAA ATCAGAGAAAGAACTGGCATGATTTTATTTTG  
152 AAAAAAAAAAAAAAAAAA TATTTTGCTCCCAATCCAAATAAGTGAGTTAA  
153 AAAAAAAAAAAAAAAAAA GCCCAATACCGAGGAAACGCAATAGGTTTACC  
128 AAAAAAAAAAAAAAAAAA TCTTACCAGCCAGTTACAAAATAAATGAAATA  
129 AAAAAAAAAAAAAAAAAA GCAATAGCGCAGATAGCCGAACAATTCAACCG  
104 AAAAAAAAAAAAAAAAAA TTTTAATTGCCCCGAAAGACTTCAAAACACTAT  
105 AAAAAAAAAAAAAAAAAA CATAACCCGAGGCATAGTAAGAGCTTTTAAAG  
80 AAAAAAAAAAAAAAAAAA GAAGCAAAAAGCGGATTGCATCAGATAAAAA  
81 AAAAAAAAAAAAAAAAAA CAAAATATAATGCAGATACATAAACACCAGA

For the second AuNR

76 ATAATAATAATAATA GGCGATCGCACTCCAGCCAGCTTTGCCATCAA  
77 ATAATAATAATAATA AAATAATTTTAAATTGTAAACGTTGATATTCA  
100 ATAATAATAATAATA TTCGCCATTGCCGAAACCAGGCATTAAATCA  
101 ATAATAATAATAATA GCTCATTTTCGCATTAAATTTTGAGCTTAGA  
124 ATAATAATAATAATA TTAAACGTTTCGGGAGAAACAATAATTTCCCT  
125 ATAATAATAATAATA TAGAATCCCTGAGAAGAGTCAATAGGAATCAT  
148 ATAATAATAATAATA ACAGAAATCTTTGAATACCAAGTTCCTTGCTT  
149 ATAATAATAATAATA CTGTAAATCATAGGTCTGAGAGACGATAAATA  
172 ATAATAATAATAATA AACCTACCGCGAATTATTCATTTCCAGTACAT  
173 ATAATAATAATAATA AAATCAATGGCTTAGGTTGGGTACTAAATTT

### **For assembly of AuNR dimers 2**

For the first AuNR

28 AAAAAAAAAAAAAAAAAA ATTAAGTTCGCATCGTAACCGTGCGAGTAACA  
29 AAAAAAAAAAAAAAAAAA ACCCGTCGTCATATGTACCCCGGTAAAGGCTA  
32 AAAAAAAAAAAAAAAAAA TTTTTCGCGAGAAAACGAGAATGAATGTTTAG  
33 AAAAAAAAAAAAAAAAAA ACTGGATAACGGAACAACATTATTACCTTATG  
34 AAAAAAAAAAAAAAAAAA CGATTTTAGAGGACAG ATGAACGGCGCGACCT  
39 AAAAAAAAAAAAAAAAAA GTTTGAGGGAAAGGGGGATGTGCTAGAGGATC  
40 AAAAAAAAAAAAAAAAAA AGAAAAGCAACATTAAATGTGAGCATCTGCCA  
43 AAAAAAAAAAAAAAAAAA CAAAATCATTGCTCCTTTTGATAAGTTTCAT  
44 AAAAAAAAAAAAAAAAAA AAAGATTTCAGGGGGTAATAGTAAACCATAAAT  
45 AAAAAAAAAAAAAAAAAA CCAGGCGCTTAATCATTGTGAATTACAGGTAG

For the second AuNR

76 ATAATAATAATAATA GGCGATCGCACTCCAGCCAGCTTTGCCATCAA  
77 ATAATAATAATAATA AAATAATTTTAAATTGTAAACGTTGATATTCA  
79 ATAATAATAATAATA TCAATTCCTTTAGTTTGACCATTACCAGACCG  
80 ATAATAATAATAATA GAAGCAAAAAGCGGATTGCATCAGATAAAAA

81 ATAATAATAATAATA CCAAAATATAATGCAGATACATAAACACCAGA  
82 ATAATAATAATAATA AGTAATCTTAAATTGGGCTTGAGAGAATACCA  
87 ATAATAATAATAATA GCTTCTGGTCAGGCTGCGCAACTGTGTTATCC  
88 ATAATAATAATAATA GTTAAAATTTTAACCAATAGGAACCCGGCACC  
90 ATAATAATAATAATA TCGCAAATGGGGCGCGAGCTGAAATAATGTGT

**For assembly of AuNR dimers 3**

For the first AuNR

176 AAAAAAAAAAAAAAAAAA AGGTTTTGAACGTCAAAAATGAAAGCGCTAAT  
177 AAAAAAAAAAAAAAAAAA ATCAGAGAAAGAACTGGCATGATTTTATTTTG  
152 AAAAAAAAAAAAAAAAAA TATTTTGCTCCCAATCCAAATAAGTGAGTTAA  
153 AAAAAAAAAAAAAAAAAA GCCCAATACCGAGGAAACGCAATAGGTTTACC  
128 AAAAAAAAAAAAAAAAAA TCTTACCAGCCAGTTACAAAATAAATGAAATA  
129 AAAAAAAAAAAAAAAAAA GCAATAGCGCAGATAGCCGAACAATTCAACCG  
104 AAAAAAAAAAAAAAAAAA TTTTAATTGCCCGAAAGACTTCAAACACTAT  
105 AAAAAAAAAAAAAAAAAA CATAACCCGAGGCATAGTAAGAGCTTTTAAAG  
80 AAAAAAAAAAAAAAAAAA GAAGCAAAAAGCGGATTGCATCAGATAAAAA  
81 AAAAAAAAAAAAAAAAAA CCAAAATATAATGCAGATACATAAACACCAGA

For the second AuNR/AuNS

78 ATAATAATAATAATA ACCGTTCTAAATGCAATGCCTGAGAGGTGGCA  
79 ATAATAATAATAATA TCAATTCCTTTAGTTTGACCATTACCAGACCG  
102 ATAATAATAATAATA AGACAGTCATTCAAAAGGGTGAGAAGCTATAT  
103 ATAATAATAATAATA TTTCATTTGGTCAATAACCTGTTTATATCGCG  
126 ATAATAATAATAATA AATTACTACAAATTCTTACCAGTAATCCCATC  
127 ATAATAATAATAATA CTAATTTATCTTTCTTATCATTATCCTGAA  
150 ATAATAATAATAATA AGGCGTTACAGTAGGGCTTAATTGACAATAGA  
151 ATAATAATAATAATA TAAGTCCTACCAAGTACCGCACTCTTAGTTGC  
174 ATAATAATAATAATA AATGGTTTACAACGCCAACATGTAGTTCAGCT  
175 ATAATAATAATAATA AATGCAGACCGTTTTTATTTTCATCTTGCGGG

**For assembly of AuNR dimers 4**

For the first AuNR

28 AAAAAAAAAAAAAAAAAA ATTAAGTTCGCATCGTAACCGTGCGAGTAACA  
29 AAAAAAAAAAAAAAAAAA ACCCGTCGTCATATGTACCCCGGTAAAGGCTA  
32 AAAAAAAAAAAAAAAAAA TTTTTCGCGAGAAAACGAGAATGAATGTTTAG  
33 AAAAAAAAAAAAAAAAAA ACTGGATAACGGAACAACATTATTACCTTATG  
34 AAAAAAAAAAAAAAAAAA CGATTTTAGAGGACAGATGAACGGCGCGACCT  
39 AAAAAAAAAAAAAAAAAA GTTTGAGGGAAAGGGGGATGTGCTAGAGGATC  
40 AAAAAAAAAAAAAAAAAA AGAAAAGCAACATTAAATGTGAGCATCTGCCA  
43 AAAAAAAAAAAAAAAAAA CAAAATCATTGCTCCTTTTGATAAGTTTCAT  
44 AAAAAAAAAAAAAAAAAA AAAGATTCAGGGGGTAATAGTAAACCATAAAT  
45 AAAAAAAAAAAAAAAAAA CCAGGCGCTTAATCATTGTGAATTACAGGTAG

For the second AuNR/AuNS

63 ATAATAATAATAATA GAAGATCGGTGCGGGCCTCTTCGCAATCATGG  
64 ATAATAATAATAATA GCAAATATCGCGTCTGGCCTTCCTGGCCTCAG  
66 ATAATAATAATAATA CGAGTAGAACTAATAGTAGTAGCAAACCTCA

67 ATAATAATAATAATA TCAGAAGCCTCCAACAGGTCAGGATCTGCGAA  
68 ATAATAATAATAATA CATTCAACGCGAGAGGCTTTTGCATATTATAG  
69 ATAATAATAATAATA AGTAATCTTAAATTGGGCTTGAGAGAATACCA  
52 ATAATAATAATAATA CAGCTGGCGGACGACGACAGTATCGTAGCCAG  
53 ATAATAATAATAATA CTTTCATCCCCAAAAACAGGAAGACCGGAGAG  
55 ATAATAATAATAATA CAATAAATACAGTTGATTCCCAATTTAGAGAG  
56 ATAATAATAATAATA TACCTTTAAGGTCTTTACCCTGACAAAGAAGT  
57 ATAATAATAATAATA TTTGCCAGATCAGTTGAGATTTAGTGGTTTAA  
58 ATAATAATAATAATA TTTCAACTATAGGCTGGCTGACCTTGTATCAT

**For assembly of AuNR dimers 5**

For the first AuNR

80 AAAAAAAAAAAAAAAAAA GAAGCAAAAAGCGGATTGCATCAGATAAAAA  
81 AAAAAAAAAAAAAAAAAA CAAAATATAATGCAGATACATAAACACCAGA  
104 AAAAAAAAAAAAAAAAAA TTTTAATTGCCCGAAAGACTTCAAAACACTAT  
105 AAAAAAAAAAAAAAAAAA CATAACCCGAGGCATAGTAAGAGCTTTTAAAG  
128 AAAAAAAAAAAAAAAAAA TCTTACCAGCCAGTTACAAAATAAATGAAATA  
129 AAAAAAAAAAAAAAAAAA GCAATAGCGCAGATAGCCGAACAATTCAACCG  
152 AAAAAAAAAAAAAAAAAA TATTTTGCTCCCAATCCAAATAAGTGAGTTAA  
153 AAAAAAAAAAAAAAAAAA GCCCAATACCGAGGAAACGCAATAGGTTTACC  
176 AAAAAAAAAAAAAAAAAA AGGTTTTGAACGTCAAAAATGAAAGCGCTAAT  
177 AAAAAAAAAAAAAAAAAA ATCAGAGAAAGAACTGGCATGATTTTATTTTG

For the second AuNR/AuNS

89 AGCTGAAATAATGTGT AGGTAAAGAAATCACCATCAATATAATATTTT  
91 ATAATAATAATAATA AAAGCGAAGATACATT TCGCAAATGGGGCGCG  
92 ATAATAATAATAATA CAGACGACAAAAGATTAAGAGGAACGAGCTTC  
93 CCAAATCACTTGCCCTGACGAGAACGCCAAAAGGAATTACTCGTTTAC  
113 TAGAAACCTATCATAT GCGTTATAGAAAAAGCCTGTTTAGAAGGCCGG  
115 ATAATAATAATAATA GAGCGTCTAATCAATAATCGGCTGCGAGCATG  
116 ATAATAATAATAATA CGAAGCCCTTCCAGAGCCTAATTTACGCTAAC  
117 TTATTCATAGGGAAGGTAAATATTCATTCAGTAAAAGTAATATCTTAC  
137 AAAATAATTAAAGCCA ACGCTCAAAATAAGAATAAACACCGTGAATTT  
139 ATAATAATAATAATA ACAATTTTCAAGAACGGGTATTAAGAACAAGA  
140 ATAATAATAATAATA AAGAAACAACAGCCATATTATTTAACCCAGCT  
141 GACTTGAGAGACAAAAGGGCGACAAGTTACCAGAAGGAAAATAAGAGC  
161 GTTTATCAAGAATCGC CATATTTAGAAATACCGACCGTGTTACCTTTT  
163 ATAATAATAATAATA AATCAAGAATCGAGAACAAGCAAGACGCGCCT  
164 ATAATAATAATAATA ACAAGAATAAACGATT TTTTGTTTAAGCCTTA  
165 AATCACCAAATAGAAAATTCATATATAACGGAATACCCAAGATAACCC  
185 AACAACATATTTAGGC AGAGGCATAATTTTCATCTTCTGACTATAACTA  
187 ATAATAATAATAATA CCTCCCGACGTAGGAATCATTACCCGACAATA  
188 ATAATAATAATAATA GTAATTGAATAGCAGCCTTTACAGTTAGCGAA  
189 CCGGAAACACACCACGGAATAAGTAAGACTCCTTATTACGGTCAGAGG

**For assembly of AuNR dimers 6**

For the first AuNR

28 AAAAAAAAAAAAAAAAAA ATTAAGTTCGCATCGTAACCGTGCGAGTAACA  
 29 AAAAAAAAAAAAAAAAAA ACCCGTCGTCATATGTACCCCGGTAAAGGCTA  
 32 AAAAAAAAAAAAAAAAAA TTTTTCGCGCAGAAAACGAGAATGAATGTTTAG  
 33 AAAAAAAAAAAAAAAAAA ACTGGATAACGGAACAACATTATTACCTTATG  
 34 AAAAAAAAAAAAAAAAAA CGATTTTAGAGGACAG ATGAACGGCGCGACCT  
 39 AAAAAAAAAAAAAAAAAA GTTTGAGGGAAAGGGGGATGTGCTAGAGGATC  
 40 AAAAAAAAAAAAAAAAAA AGAAAAGCAACATTAAATGTGAGCATCTGCCA  
 43 AAAAAAAAAAAAAAAAAA CAAAAATCATTGCTCCTTTTGATAAGTTTCAT  
 44 AAAAAAAAAAAAAAAAAA AAAGATTACAGGGGGTAATAGTAAACCATAAAT  
 45 AAAAAAAAAAAAAAAAAA CCAGGCGCTTAATCATTGTGAATTACAGGTAG

For the second AuNR/AuNS

51 ACTGCCCCGCGAGCTCGAATTCGTTATTACGCCAGCTGGCGGACGACG  
 52 ATAATAATAATAATA ACAGTATCGTAGCCAGCTTTCATCCCCAAAAA  
 53 ATAATAATAATAATA CAGGAAGACCGGAGAGGGTAGCTAGGATAAAA  
 55 ATAATAATAATAATA TTCCCAATTTAGAGAGTACCTTTAAGGTCTTT  
 56 ATAATAATAATAATA ACCCTGACAAAGAAGTTTGGCCAGATCAGTTG  
 57 ATAATAATAATAATA AGATTTAGTGGTTTAATTTCAACTATAGGCTG  
 58 ATAATAATAATAATA GCTGACCTTGTATCATCGCCTGATGGAAGTTT  
 60 CCATTAAACATAACCG ATATATTCTTTTTTTCACGTTGAAAATAGTTAG  
 61 TAATTGCGCCCTGAGA GAGTTGCACGAGATAGGGTTGAGTAAGGGAGC  
 63 ATAATAATAATAATA CTCTTCGCAATCATGGTCATAGCTACTCACAT  
 64 ATAATAATAATAATA GCCTTCCTGGCCTCAGGAAGATCGGTGCGGGC  
 66 ATAATAATAATAATA TAGTAGCAAACCCTCATATATTTTAGCTGATA  
 67 ATAATAATAATAATA GGTCAGGATCTGCGAACGAGTAGAACTAATAG  
 68 ATAATAATAATAATA CTTTTCGATATTATAGTCAGAAGCCTCCAACA  
 69 ATAATAATAATAATA CTTGAGAGAATACCACATTCAACGCGAGAGG  
 70 ATACGTAAAAGTACAACGGAGATTTTCATCAAGAGTAATCTTAAATTGG

### 3. Thiolated Capture strand sequences

Thiolated S15 5'-TTTTTTTTTTTTTTT GAGC-SH-3'

Thiolated S10 5'-TATTATTATTATTAT TTTT-SH-3'

### References

1. Kyle Lund et. al. Nature. 2010, 465, 206-310.
2. B. Nikoobakht and M. A. El-Sayed, Chem. Mater. 2003, 15, 1957.
3. E. D. Palik, Ed., Handbook of Optical Constant of Solids Academic: New York, 1985.
